# Supplementary material
Source: PubMed Central journal article supplement (PMC4856768)
Supplement: cr201646x3.pdf [file cr201646x3.pdf]

**Supplementary Information, Table S1A List of oligonucleotide repair templates**

**used in this study.**

| <b>Oligo name</b>                                | <b>Sequence 5'-3'</b>                                                                                                           |
|--------------------------------------------------|---------------------------------------------------------------------------------------------------------------------------------|
| <i>ben-1</i> <sup>22</sup> oligo                 | TCATATAACTTCAAAAAGAACTTGGAAAAAATGAGAGAAATT<br>GTTACAGTTTTAAGCCGGACAATGTGGTAATCAAATCGGAGCCA<br>AGTTCTGGGAAGTGAT                  |
| <i>ben-1</i> <sup>153</sup> oligo ( $\pm 50$ nt) | ACTTATAAGGGAGAAAGTGATTTGCAGTTGGAAAGAATCAAT<br>GTCTACTAGAATGAGGCTAATGGTGAGAAATTTAGCTTTTTTA<br>TTCGATTTTCAGATTC                   |
| <i>ben-1</i> <sup>1340</sup> oligo               | TTCAGCCTCTTTTCGAACTACGTCGAGCACATTATCGACAAGTT<br>CGGCTCATTTCGGTGTAGTGACCCTTGGCCAGTTGTTTCCGGCT<br>CCGGATTGTCCGA                   |
| <i>ben-1</i> <sup>1499</sup> oligo               | AATTAATCCAACCTTTGGCGACGGAACAACCGAGAAAGAACT<br>CATAATTCAATCTGGATACTTTCACGGATTTTCGAAATGAGA<br>AGAGTTCCCATTCAG                     |
| <i>drp-1</i> oligo                               | TCGATGCCGTGCGAAAAGAAATCGAAGATGAACTGCGCGCG<br>TAACTGGAGTGAATAAAGGAATCTCTCTTCTTCC                                                 |
| <i>flag::ced-9</i> oligo                         | TCTAGAATGTATATTATGATTATGAAAACGAATAAAAATTTTA<br>GATGGACTACAAGGACGACGATGACAAGACACGCTGCACGGC<br>GGACAACCTCGCTGACGAATCCGGCGTATCGGCG |
| <i>fis-2</i> oligo                               | GTCGACTTTTGCCTTTGCACATGCCATGATTGGATCCAAGCTTT<br>AACTGGACGTGAAGGAGGGAATCGTGTGTCTTGAGAGTGA                                        |
| <i>ubr-1</i> oligo                               | CTAGACGTTTCGGAACACAAAGAGCACACTGGAAGCTTAAAAT<br>GGCATTGCCGGAGTTGATCCTGCAAGACGGGG                                                 |
| <i>ben-1</i> <sup>153</sup> oligo ( $\pm 25$ nt) | AGTTGGAAAGAATCAATGTCTACTAGAATGAGGCTAATGGTGA<br>GAAATTTA                                                                         |
| <i>ben-1</i> <sup>153</sup> oligo ( $\pm 20$ nt) | GAAAGAATCAATGTCTACTAGAATGAGGCTAATGGTGAGAA                                                                                       |
| <i>ben-1</i> <sup>153</sup> oligo ( $\pm 15$ nt) | AATCAATGTCTACTAGAATGAGGCTAATGGT                                                                                                 |
| <i>ben-1</i> <sup>153</sup> oligo ( $\pm 10$ nt) | ATGTCTACTAGAATGAGGCTA                                                                                                           |
| <i>ben-1</i> <sup>136</sup> oligo                | ACTTATAAGGGAGAAAGTGATTTGCAGTTGGAATGAATCAATG<br>TCTACTATAATGAGGCTAATGGTGAGAAATTTAGCTTTTTTATT<br>CGATTTTCAGATTC                   |
| <i>ben-1</i> <sup>127</sup> oligo                | AACTTATAAGGGAGAAAGTGATTTGTAGTTGGAAAGAATCAAT<br>GTCTACTATAATGAGGCTAATGGTGAGAAATTTAGCTTTTTTAT<br>TCGATTTTCAGATTC                  |
| <i>ben-1</i> <sup>115</sup> oligo                | CCAGCCTGATGGAACCTTATAAGGGATAAAGTGATTTGCAGTTG<br>GAAAGAATCAATGTCTACTATAATGAGGCTAATGGTGAGAAAT<br>TTAGCTTTTTTATTTCGATTTTCAGATTC    |

**Supplementary Information, Table S1B List of primers used in this study.**

| <b>Usage</b>        | <b>Primer</b>                  | <b>Sequence (5'-3')</b>    |
|---------------------|--------------------------------|----------------------------|
| <b>Genotyping</b>   | <i>ben-1</i> F1                | CCCTGGCTAGTTCAAACGAAGAG    |
|                     | <i>ben-1</i> R1                | CCCATAGGTTCCCGTATGTC       |
|                     | <i>ben-1</i> F2                | TGCGCATTTCGCGCTCTATAGCAACC |
|                     | <i>ben-1</i> R2                | CGTCCACGGAACATTGCAGCTACAG  |
|                     | <i>drp-1</i> F                 | TCCACAGATTGTAGTCGTCG       |
|                     | <i>drp-1</i> R                 | CTTTCAGTGCAGGAAGACAG       |
|                     | <i>ced-9</i> F                 | TTTGCCGTTTCGATTTACCG       |
|                     | <i>ced-9</i> R                 | TGTGCATTTCCAACCGTCCG       |
|                     | <i>fis-2</i> F                 | ACTATTCTCGAGGAACGGAC       |
|                     | <i>fis-2</i> R                 | ACCCGTTCACTTTTGTTCGG       |
|                     | <i>ubr-1</i> F                 | TACGCCAGCTGCTGCTCAAG       |
|                     | <i>ubr-1</i> R                 | CCGTCAAATATTGCTGTGCC       |
|                     | <b>Allele-specific primers</b> | <i>ced-9</i> flag F        |
| <i>ced-9</i> flag R |                                | CATCGTCGTCCTTGTAGTCC       |
| <i>ced-9</i> N2 F   |                                | CGAATAAAAATTTTAGATGACACGC  |
| <i>ced-9</i> N2 R   |                                | GTGTTCCCTCCAGTTGTTGC       |

To confirm that precise knock-ins occurred at the targeted sites in edited animals, genomic DNA spanning each sgRNA target site was PCR amplified using “genotyping” primers and subjected to sequencing analysis. The *ben-1* F1/R1 primer pair was used to amplify the genomic DNA spanning the *ben-1*<sup>22</sup> and *ben-1*<sup>153</sup> positions. The *ben-1* F2/R2 primer pair was used to amplify the genomic DNA spanning *ben-1*<sup>1340</sup>, *ben-1*<sup>1499</sup> sgRNA target sites. *drp-1* F/R, *ced-9* F/R, *fis-2* F/R and *ubr-1* F/R primer pairs were used to amplify the genomic DNA spanning the *drp-1*, *ced-9*, *fis-2* and *ubr-1* sgRNA target sites, respectively. For *drp-1*, *fis-2* and *ubr-1* editing experiments, the same PCR products were digested with restriction enzymes to identify the knock-in animals. In the *flag::ced-9* editing experiments, we used allele-specific primers to identify *flag::ced-9* knock-in animals (*ced-9* flag F/R) from benomy1<sup>R</sup> F1 animals and homozygous F2 animals with knock-ins (*ced-9* flag F/R and *ced-9* N2 F/R).
